# Supplementary material for: Analysing the Relationship between University Students’ Ecological Footprint and Their Connection with Nature and Pro-Environmental Attitude
Source: Int J Environ Res Public Health. 2020 Nov 27;17(23):8826. doi: 10.3390/ijerph17238826 (PMC7730122; doi:10.3390/ijerph17238826)
Supplement: Supplementary file 1 [file ijerph-17-08826-s001.xlsx]

## Sheet: EF 
			Data UIC (gh)						Data US (gh)						Data UCA (gh)						Data UCJC (gh)
n53	Carbon Footprint	Food Footprint	Housing Footprint	Goods and Services Footprint	EF (global)	n42	Carbon Footprint	Food Footprint	Housing Footprint	Goods and Services Footprint	EF (global)	n52	Carbon Footprint	Food Footprint	Housing Footprint	Goods and Services Footprint	EF (global)	n19	Carbon Footprint	Food Footprint	Housing Footprint	Goods and Services Footprint	EF (global)
s1	4.29	1.83	0.56	1.2	7.88	s1	0.629	2.2	0.52	0.97	4.319	s1	0.68	1.65	0.42	1.03	3.78	s1	0.97	1.4	0.5	0.69	3.56
s2	1.47	1.49	0.45	1.08	4.49	s2	0.621	1.95	0.33	1.1	4.001	s2	0.71	1.79	0.48	0.79	3.76	s2	1.85	1.91	0.62	1.12	5.5
s3	0.91	1.49	0.32	1.11	3.84	s3	0.75	0.9	0.52	1	3.17	s3	1.2	1.65	0.52	1.09	4.46	s3	0.6	2.03	0.46	1.08	4.17
s4	0.62	1.95	0.47	0.98	4.03	s4	0.98	1.49	0.58	0.26	3.31	s4	1.18	1.25	0.28	1.33	4.03	s4	0.49	1.74	0.41	1.05	3.69
s5	0.67	1.79	0.36	0.9	3.71	s5	0.52	1.49	0.41	0.7	3.12	s5	0.88	1.79	0.56	1.41	4.64	s5	0.47	1.49	0.48	0.85	3.29
s6	0.88	1.49	0.52	0.89	3.78	s6	0.99	1.95	0.69	1.42	5.05	s6	0.69	1.79	0.19	0.62	3.29	s6	0.69	1.49	0.56	0.74	3.48
s7	1.83	1.49	0.53	1.07	4.93	s7	0.66	2.38	0.43	0.6	4.07	s7	0.73	1.79	0.53	0.42	3.46	s7	0.63	1.49	0.35	1.03	3.5
s8	0.72	1.49	0.43	0.92	3.56	s8	0.93	1.95	0.56	0.92	4.36	s8	0.45	1.91	0.63	0.48	3.46	s8	0.75	1.7	0.32	0.74	3.5
s9	0.58	0.94	0.52	0.81	2.85	s9	0.64	1.49	0.42	0.73	3.28	s9	0.58	1.36	0.46	0.38	2.78	s9	0.42	0.82	0.26	0.74	2.24
s10	0.8	1.49	0.61	0.44	3.34	s10	0.73	1.71	0.52	0.92	3.88	s10	1.13	1.65	0.16	0.64	3.57	s10	3.67	1.19	0.74	0.6	6.21
s11	0.64	1.95	0.54	0.98	4.11	s11	1.8	1.65	0.59	0.84	4.88	s11	0.74	1.49	0.34	0.45	3.02	s11	4.48	1.24	0.17	0.74	6.63
s12	0.95	1.24	0.56	0.38	3.13	s12	0.66	2.2	0.73	0.73	4.32	s12	0.54	1.79	0.54	0.63	3.5	s12	0.58	1.49	0.44	0.86	3.36
s13	0.66	1.95	0.45	0.41	3.47	s13	0.67	1.19	0.46	0.43	2.75	s13	0.68	1.49	0.57	0.44	3.19	s13	1.76	1.49	0.52	0.55	4.31
s14	0.54	1.45	0.37	1.03	3.39	s14	0.61	1.74	0.48	1.19	4.02	s14	1.45	1.49	0.54	1	4.48	s14	2.54	1.65	0.43	1.02	5.64
s15	0.71	1.19	0.58	0.74	3.23	s15	1.17	1.49	0.41	0.64	3.71	s15	0.64	1.79	0.45	0.48	3.36	s15	0.62	1.41	0.48	0.1	2.62
s16	0.99	1.49	0.43	0.94	3.86	s16	0.56	1.65	0.41	1.03	3.65	s16	0.64	1.49	0.48	0.65	3.26	s16	3.12	2.08	0.32	0.91	6.43
s17	0.58	1.49	0.44	0.69	3.19	s17	0.75	1.79	0.26	0.94	3.74	s17	0.68	1.95	0.64	0.52	3.8	s17	0.55	1.49	0.7	0.98	3.72
s18	0.98	1.03	0.39	1.08	3.49	s18	1.04	1.74	0.41	0.84	4.03	s18	0.74	1.79	0.49	0.65	3.66	s18	0.63	1.49	0.44	1.04	3.6
s19	0.93	1.49	0.48	0.86	3.75	s19	0.54	1.24	0.38	0.75	2.91	s19	0.42	1.49	0.43	0.88	3.22	s19	0.61	1.79	0.45	0.93	3.78
s20	0.62	1.79	0.32	1.16	3.89	s20	0.72	1.49	0.46	1.04	3.71	s20	1.73	1.49	0.52	0.56	4.31	Average	1.33842	1.54684	0.455263	0.83	4.17
s21	1.04	1.95	0.61	1.25	4.86	s21	0.629	1.49	0.37	0.96	1.959	s21	1.13	1.65	0.65	0.41	3.85	SD	1.23323	0.297472	0.140806	0.243995	1.27984
s22	0.5	0.66	0.62	0.54	2.32	s22	0.93	1.49	0.6	1.37	4.39	s22	0.66	1.19	0.39	0.3	2.27
s23	0.67	1.49	0.47	1.11	3.75	s23	1.07	1.7	0.47	0.42	3.66	s23	0.87	1.49	0.45	0.81	3.62
s24	0.45	1.24	0.4	0.6	2.68	s24	0.79	1.49	0.44	0.46	3.18	s24	1.34	1.49	0.6	0.47	3.9
s25	0.87	1.79	0.78	0.89	4.32	s25	0.9	1.79	0.36	0.26	3.31	s25	0.47	1.65	0.53	0.78	3.44
s26	1.2	1.49	0.65	0.84	4.18	s26	0.6	1.49	0.39	0.68	3.16	s26	0.85	1.79	0.5	0.65	3.78
s27	0.54	1.24	0.36	0.69	2.83	s27	0.6	1.49	0.36	0.27	2.72	s27	1.09	1.31	0.41	0.4	3.22
s28	1.05	1.79	0.57	1	4.4	s28	0.46	1.35	0.43	0.62	2.86	s28	2.4	1.49	0.56	0.28	4.74
s29	0.65	2.54	0.57	1.33	5.08	s29	0.7	1.24	0.48	0.53	2.95	s29	1.01	1.65	0.32	0.93	3.92
s30	0.56	1.95	0.32	0.6	3.42	s30	1.13	2.08	0.83	0.56	4.6	s30	1.45	1.4	0.28	0.89	4.02
s31	0.7	1.49	0.47	0.64	3.3	s31	1.23	1.65	0.59	1.21	4.68	s31	0.87	1.95	0.43	0.9	4.15
s32	0.53	1.49	0.57	0.72	3.31	s32	0.73	1.79	0.63	1	4.15	s32	1.25	1.24	0.58	0.47	3.54
s33	0.56	1.49	0.65	0.81	3.52	s33	1.21	1.49	0.35	0.72	3.77	s33	0.68	1.79	0.44	0.58	3.44
s34	1.31	1.49	0.6	1.01	4.4	s34	1.21	1.49	0.35	0.72	3.77	s34	0.52	1.79	0.73	0.72	3.76
s35	2.27	1.19	0.25	0.45	4.17	s35	0.99	1.95	0.28	0.63	3.85	s35	0.76	1.19	0.23	0.5	2.69
s36	1.02	1.49	0.39	0.86	3.75	s36	0.92	1.7	0.46	0.75	3.83	s36	0.62	1.49	0.57	0.92	3.61
s37	0.74	1.79	0.7	0.72	3.95	s37	1.13	1.49	0.41	0.9	3.93	s37	0.69	2.34	0.65	1.06	4.74
s38	0.63	1.19	0.52	0.8	3.14	s38	0.37	0.86	0.61	0.68	2.52	s38	0.64	1.49	0.33	0.78	3.23
s39	1.59	1.19	0.5	0.95	4.24	s39	0.8	2.12	0.48	0.75	4.15	s39	0.6	1.7	0.36	0.88	3.54
s40	2.27	1.19	0.25	0.45	4.17	s40	1.14	1.79	0.69	1.33	4.95	s40	0.64	2.38	0.42	0.76	4.2
s41	0.7	1.49	0.14	0.67	3.01	s41	0.68	1.79	0.6	1.13	4.2	s41	0.68	2.17	0.42	0.76	4.03
s42	0.66	1.74	0.65	1	4.05	s42	0.55	1.49	0.58	0.93	3.55	s42	0.54	2.16	0.65	0.85	4.2
s43	0.55	1.49	0.48	1.01	3.53	Average	0.827119	1.64439	0.484048	0.807857	3.72426	s43	0.63	1.49	0.69	1.2	4.01
s44	0.66	1.49	0.48	1.09	3.73	SD	0.277376	0.323358	0.12453	0.288711	0.686055	s44	0.39	1.87	0.47	1.03	3.76
s45	0.54	1.49	0.39	0.68	3.11							s45	0.63	1.49	0.39	1.2	3.71
s46	1.59	1.49	0.43	0.83	4.35							s46	0.57	1.08	0.4	0.55	2.6
s47	0.52	1.19	0.43	1.16	3.3							s47	1.21	1.79	0.31	0.8	4.11
s48	1.36	1.49	0.42	1.27	4.54							s48	0.47	1.65	0.69	0.47	3.28
s49	0.72	2.08	0.58	1.04	4.42							s49	0.64	2.07	0.43	1.08	4.22
s50	0.66	1.95	0.49	1.01	4.1							s50	0.61	1.79	0.44	0.8	3.64
s51	1.59	1.19	0.5	0.95	4.24							s51	1.2	1.4	0.41	0.5	3.51
s52	1.86	1.79	0.39	1.07	5.11							s52	0.71	1.49	0.38	0.9	3.48
s53	0.54	1.49	0.38	0.86	3.27							Average	0.832885	1.65019	0.468077	0.732308	3.67769
Average	0.971132	1.52887	0.478113	0.878679	3.77195							SD	0.373449	0.280367	0.129373	0.269863	0.522493
SD	0.645936	0.321664	0.121435	0.233238	0.832248
